# Supplementary material for: Gypenosides exert cardioprotective effects by promoting mitophagy and activating PI3K/Akt/GSK-3β/Mcl-1 signaling
Source: PeerJ. 2024 Jun 20;12:e17538. doi: 10.7717/peerj.17538 (PMC11193969; doi:10.7717/peerj.17538)
Supplement: Supplemental Information 2 [file peerj-12-17538-s002.xlsx]

## Sheet: ATP
	GYPs				GYPs
CON	10	20	40	Dox	10	20	40
18.2613	17.8784	18.6445	18.1499	15.3079	17.1497	17.3237	18.6082
18.7817	18.4644	18.9229	17.9552	14.4102	16.2958	16.8642	18.5845
16.9983	17.0153	17.6153	17.8134	12.8834	14.8516	15.5531	16.8658

## Sheet: CCK8
Dox (μg/ml)
0	5	10	20	40	80	160	320
93.6345	96.3039	98.6653	96.2012	99.4866	94.7639	87.7823	57.9055
102.772	93.0185	98.0493	98.5626	103.799	94.7639	87.3717	65.0924
105.442	102.875	103.285	88.0904	102.156	96.2012	89.0144	73.922
98.3573	98.8706	99.1786	100	100	95.5051	83.3676	60.2669
100.103	97.6386	96.2012	97.0226	104.209	94.9692	94.2505	63.039
101.437	98.8706	102.669	102.259	102.156	92.9158	84.8049	69.3019
98.2546	103.388	100.205	105.544	93.9425	97.7105	88.501	/
Con	Dox	Dox+GYPs10	Dox + GYPs 20	Dox + GYPs 40
94.6345	59.5277	65.1742	76.8279	75.1803
102.772	48.8993	63.4618	75.0921	63.8143
105.442	40.4344	57.4868	66.8753	69.6345
98.3573	54.6	59.6	66.2	70.4

## Sheet: DHE
Con	Dox	Dox+GYPs10	Dox + GYPs 20	Dox + GYPs 40
363.197	567.885	658.192	637.033	692.261
221.259	442.622	494.018	424.101	532.693
339.521	631.191	491.953	446.443	612.64
282.126	483.002	451.074	774.88	558.588
216.777	359.05	358.031	432.884	539.982
238.6	592.566	666.754	387.984	499.508
273.762	646.29	716.198	390.934	629.15
265.27	662.725	505.795	484.601	505.529

## Sheet: Rh123
Con	Dox	Dox+GYPs10	Dox + GYPs 20	Dox + GYPs 40
120.755	72.6936	102.374	93.7043	136.401
127.267	84.3211	93.2989	111.478	125.817
132.922	78.0976	96.3881	98.6333	109.825
121.043	83.548	82.9325	102.635	108.236
124.11	76.8084	95.3622	99.4503	121.584
111.974	78.5379	91.7381	94.1268	107.697
191.96	89.7669	107.193	108.188	145.124
111.339	86.1819	85.9026	115.056	111.575

## Sheet: OCR
time (min)	Con			Dox			Dox + GYPs10			Dox + GYPs 20			Dox + GYPs 40			GYPs 40
0	100	100	100	100	100	100	100	100	100	100	100	100	100	100	100	100	100	100
10	95.8719	96.0908	97.1848	95.8394	96.0217	97.0816	99.4643	97.5005	96.8516	96.172	99.3038	97.0549	97.3676	93.3686	100.181	95.718	99.2996	93.3691
20	95.7493	94.8391	94.8659	94.3747	94.5772	94.804	99.0509	95.5173	94.5682	90.4325	98.0854	95.7187	95.4706	92.811	100.889	94.0447	99.1194	92.8112
30	93.7844	93.403	93.1695	94.82	93.7931	93.4577	99.1159	93.8853	92.5708	89.8739	96.1933	93.6435	93.8108	91.6614	98.9331	94.3109	98.0611	91.6627
40	93.5313	92.1486	92.8657	94.8759	92.8327	93.0478	99.0743	92.1973	91.9104	88.7295	96.3225	93.7853	94.7773	90.1773	98.0122	94.0067	97.1469	90.1776
50	92.8372	92.6905	91.8642	94.2798	92.8643	91.4421	99.4773	91.8843	91.7453	88.305	95.9545	93.3817	94.7983	90.0686	96.0117	93.6987	95.1656	90.0712
60	91.9604	91.4525	90.4054	93.854	92.1697	91.6496	98.4372	91.0548	91.278	87.2598	96.0913	93.5317	96.4101	88.6217	95.3163	92.6491	94.4751	88.6215
70	91.9604	90.8253	89.3497	92.3455	90.5857	91.5847	97.8365	89.5189	90.7199	86.0632	94.8058	92.1218	94.9514	87.8067	95.8497	90.4662	95.0047	87.8093
80	91.0524	89.403	87.1872	92.1241	90.5199	90.7702	96.8718	89.5904	90.1223	85.1894	94.7213	92.0291	93.4806	87.698	93.4523	90.1886	92.6295	87.7003
90	91.449	88.5447	86.339	91.1192	90.4594	89.8752	97.2463	88.05	89.8479	84.1418	94.0027	91.241	93.5857	86.4398	93.5666	88.1579	92.7416	86.4419
100	89.946	88.6355	86.4232	90.3479	89.6674	89.4861	95.2883	86.2346	89.6387	82.3892	94.7163	92.0237	93.4386	85.7764	92.3028	88.0324	91.4884	85.7769
110	89.7372	87.0096	84.4351	89.5523	88.9149	89.0451	94.6798	86.286	89.2806	81.8083	92.9335	90.0684	92.394	85.0129	92.144	85.9484	90.8326	85.0143
120	88.9909	86.4759	83.7825	90.2822	87.9177	87.6625	94.1961	85.0742	88.2505	79.8893	93.4905	90.6793	91.7757	84.4495	91.6741	86.6482	89.8658	84.4505
130	88.2577	85.7194	82.9493	89.6691	87.7204	87.6261	92.0483	83.7641	87.8296	79.1445	92.6028	89.7058	90.9383	82.8196	89.4227	84.3208	88.6346	82.8197
140	87.8454	84.5832	82.1673	87.9854	86.3522	87.18	90.2592	82.995	86.8902	78.3501	91.4342	88.4241	88.3299	81.7729	88.3145	83.4081	87.5348	81.7753
150	86.4755	83.7139	79.7251	87.4453	86.2022	86.355	88.6523	82.0157	86.1554	75.9024	89.9871	86.837	86.2679	81.6042	86.2886	80.6625	85.5284	81.6051
160	85.3508	83.1059	78.4348	87.2019	84.484	85.6442	86.8919	80.2897	85.3067	74.9193	89.639	86.4552	85.5865	80.4575	85.9806	79.6965	85.2234	80.458
	Oxygen Comsumption
	(pmol/min )
	Con	Dox	Dox+GYPs10	Dox + GYPs 20	Dox + GYPs 40	GYPs 40-
	26.5771	12.4757	23.7301	18.2177	24.8778	26.7647
	23.9938	13.1887	20.062	26.3917	30.3038	27.9906
	21.3116	15.6098	14.2335	25.9435	25.9056	33.4727

## Sheet: fusion and fission WB
	MFN1				MFN2			DRP1				Fis1
CON	1	1	1	1	1	1	1	1	1	1	1	1	1	1	1
Dox	1.152	0.709	0.914	1.094	0.932	1.152	0.780279	0.724	0.749	0.793	0.829	1.18924	1.06515	1.03693	0.882872
Dox + GYPs 10	1.304	1.074	0.976	1.043	0.928	1.304	0.704203	0.859	0.698	0.72	0.915	1.2785	0.975894	1.00868	0.986121
Dox + GYPs 20	1.031	1.317	0.747	0.903	0.899	1.031	0.824777	0.578	1.007	0.894	0.964	1.12962	1.09621	1.10191	0.911762
Dox + GYPs 40	1.141	1.199	0.752	0.932	0.827	1.141	0.917865	0.687	1.041	1.036	0.827	1.16163	1.0328	1.26337	0.816232

## Sheet: mitophagy WB
	PINK-1			Parkin			LC3-II/LC3-I
CON	1	1	1	1	1	1	1	1	1	1	1
Dox	0.604951	0.466726	0.735764	0.3	0.56	0.56	1.31676	1.09415	1.42335	1.44148	1.33172
Dox + GYPs 10	0.817435	0.578169	0.725441	0.84	0.84	0.73	0.996314	1.04319	1.51691	1.28175	1.32789
Dox + GYPs 20	0.948704	0.761615	1.10883	0.91	0.93	0.71	1.4113	0.903276	1.46142	1.12229	1.29894
Dox + GYPs 40	0.994971	0.955502	1.02508	0.99	0.94	0.8	1.135	0.931757	1.51126	1.40448	1.12739

## Sheet: p-GSK
	Con	Dox	Dox+GYPs10	Dox + GYPs 20	Dox + GYPs 40
	1	0.754041	0.91795	1.03128	0.911702
	1	0.594509	0.639595	1.12186	1.09836
	1.03611	0.738445	0.933255	1.18647	0.904015
	1	0.727809	1.01326	1.02784	0.958307

## Sheet: p-Akt
Con	Dox	Dox+GYPs10	Dox + GYPs 20	Dox + GYPs 40
1	0.71888	0.823485	0.795889	1.08156
1	0.613509	0.890529	0.920932	0.975877
1	0.58039	0.857246	1.11908	1.15071

## Sheet: p-pi3k
Con	Dox	Dox+GYPs10	Dox + GYPs 20	Dox + GYPs 40
1	0.58	0.64	0.79	0.82
1	0.43	0.73	0.88	0.96
1	0.41	0.52	0.9	0.93

[truncated: 1 more sheets: Mcl-1]
